# Supplementary material
Source: Springer Nature journal article supplement (https://www.springermedizin.de/resource/supplementary/12958_2010_752_MOESM2_ESM.pdf/9568402)

### A. BeWo cells

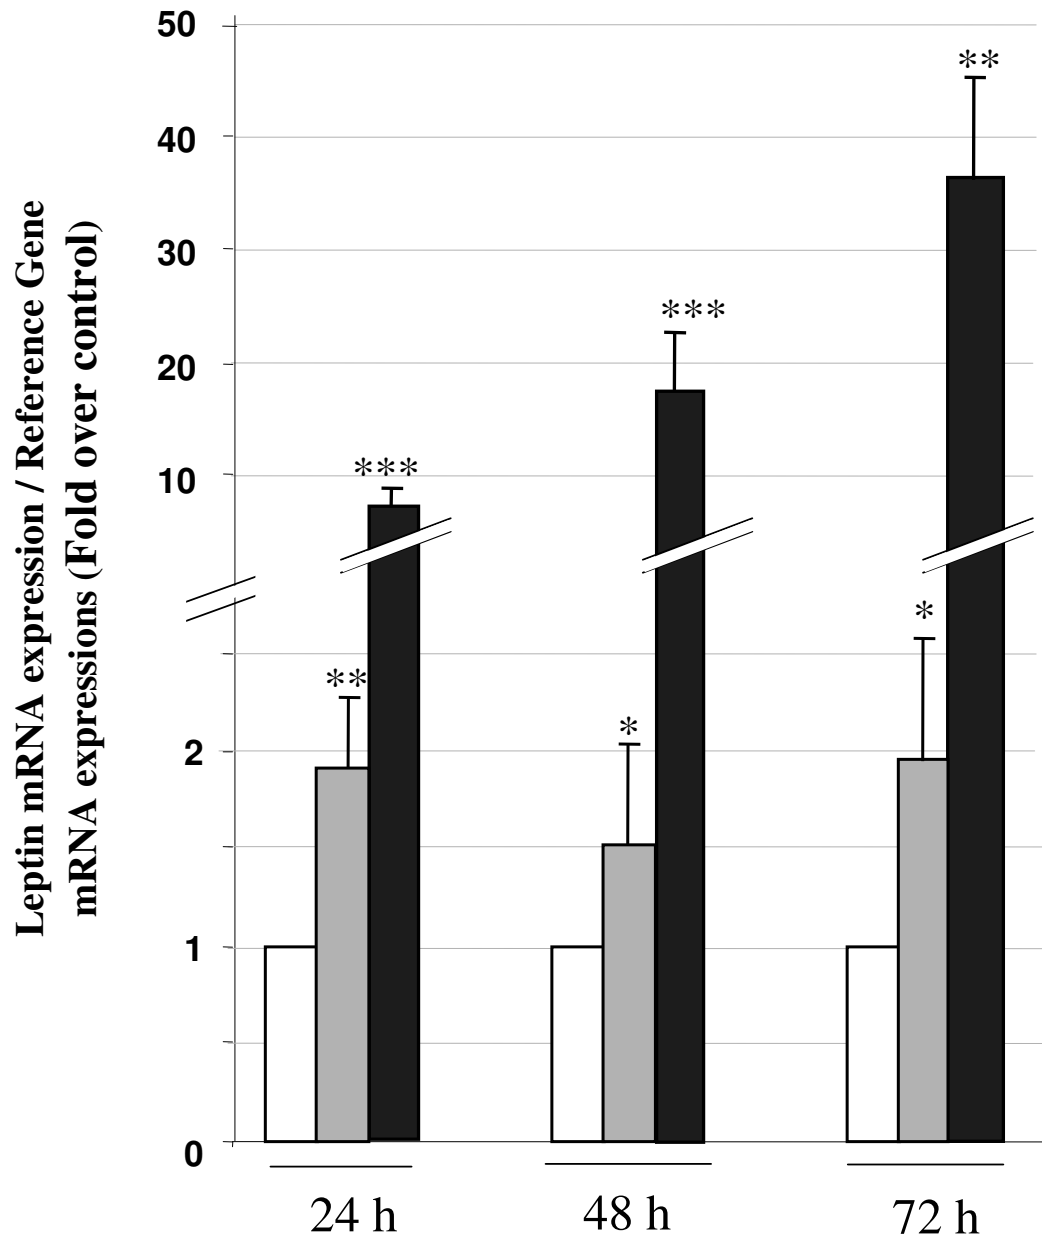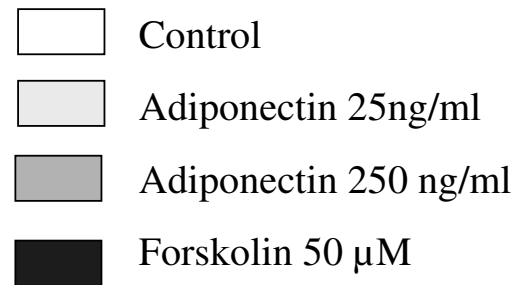

### B. Villous CT

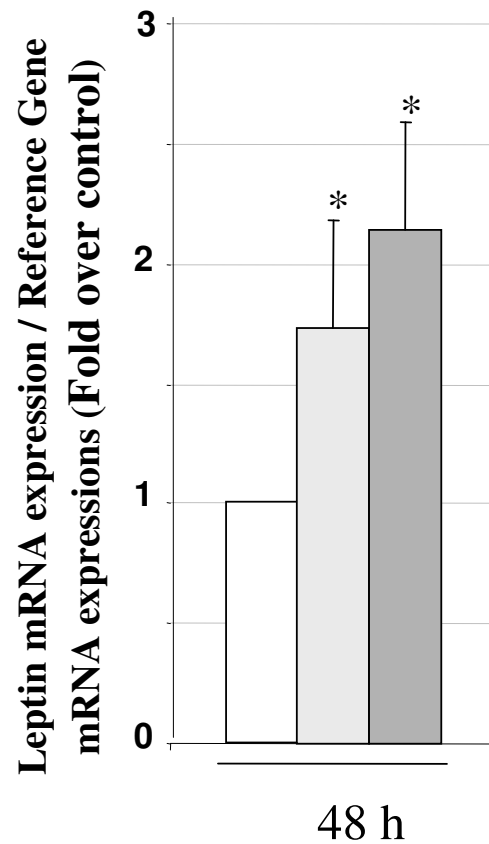

Supplement: MOESM2 [file 9568402]
